# Supplementary material for: Modeling of Organic Aerosol in Seoul Using CMAQ with AERO7
Source: MDPI journal article supplement (doi:10.3390/atmos14050874), 2023-05-16
Supplement: s1 [file s1]

## Supplementary Materials:

HyeonYeong Park <sup>1</sup>, SungChul Hong <sup>2</sup>, Jae-Bum Lee <sup>2</sup> and SeogYeon Cho <sup>1,\*</sup>

<sup>1</sup> Department of Environmental Engineering, Inha University, Incheon 22212, Republic of Korea; hyepark@inha.edu

<sup>2</sup> Air Quality Forecasting Center, National Institute of Environmental Research (NIER), Incheon 22689, Republic of Korea; schong@korea.kr (S.H.); gercljb@korea.kr (J.-B.L.)

\* Correspondence: sycho@inha.ac.kr; Tel.: +82 32-860-7506

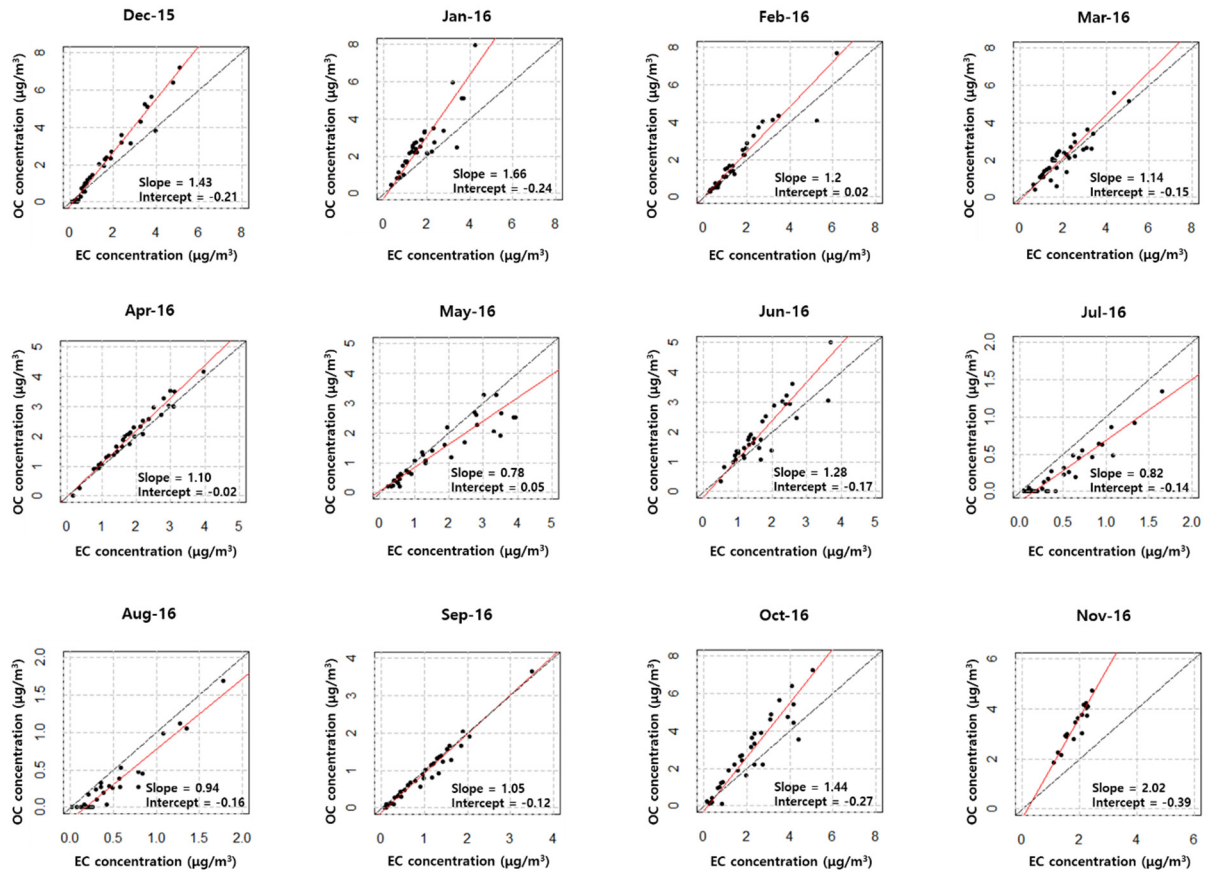

Figure S1. Monthly Deming regression analysis results in BG supersite.

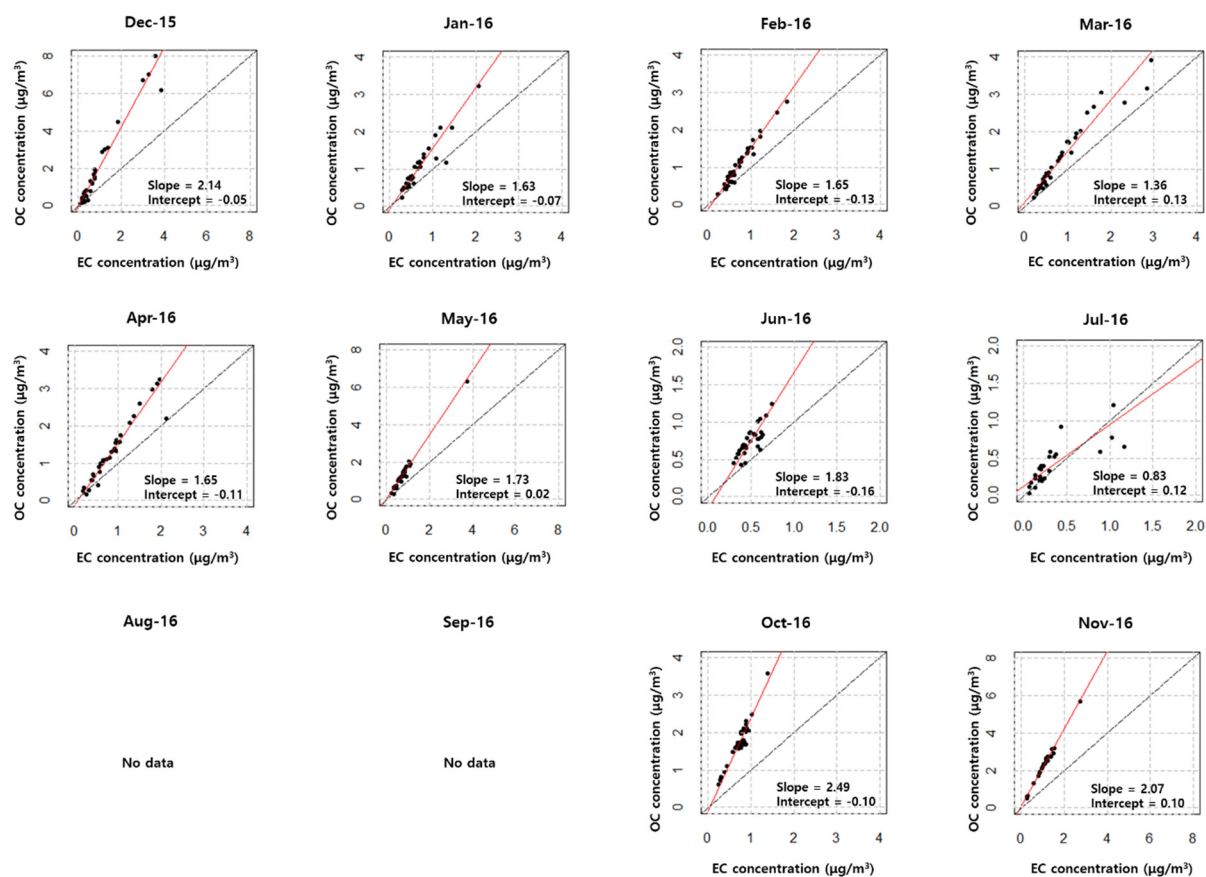

Figure S2. Monthly Deming regression analysis results in BN supersite.
